# Supplementary material for: Ubiquitin-specific protease 14 regulates c-Jun N-terminal kinase signaling at the neuromuscular junction
Source: PubMed Central journal article supplement (PMC4417291; doi:10.1186/1750-1326-10-3), 2015-01-10

A

wild type

*TgUsp14CA*

1 week

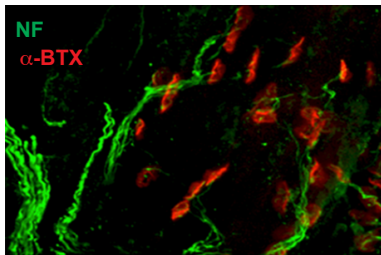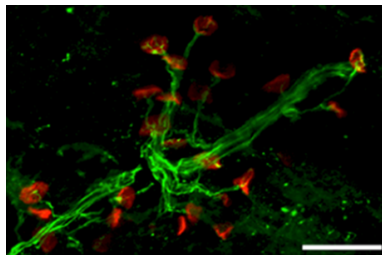

2 weeks

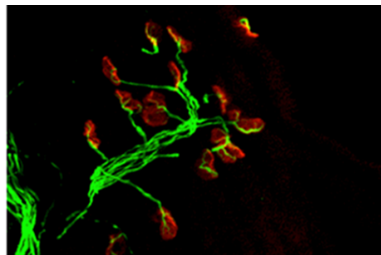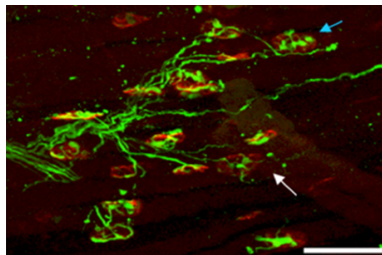

Supplement: 13024_2014_579_MOESM2_ESM.pdf [file 13024_2014_579_MOESM2_ESM.pdf]
